# Supplementary material for: A Bayesian Framework to Identify Methylcytosines from High-Throughput Bisulfite Sequencing Data
Source: PLoS Comput Biol. 2014 Sep 25;10(9):e1003853. doi: 10.1371/journal.pcbi.1003853 (PMC4177668; doi:10.1371/journal.pcbi.1003853)
Supplement: Table S1 — The validation results of Bycom and Lister on public data. (XLSX) [file pcbi.1003853.s003.xlsx]

## Sheet: Sheet1
	True positive(CpG/CpH)				False positive(CpG/CpH)
	YH	Aspergillus	Silkworm_Sanger	Silkworm_454	YH	Aspergillus	Silkworm_Sanger	Silkworm_454
Bycom	13/0	0/0	17/0	417/0	0/0	0/0	0/1	49/15
Lister	11/0	0/0	19/0	426/0	0/0	0/0	1/15	44/25
Total	24/0	0/0	24/0	574/0	15/0	24	2/99	118/92
Note: CpH (CpA, CPT and CpC)
